# Supplementary material for: Clathrin coat controls synaptic vesicle acidification by blocking vacuolar ATPase activity
Source: eLife. 2018 Apr 13;7:e32569. doi: 10.7554/eLife.32569 (PMC5935483; doi:10.7554/eLife.32569)
Supplement: Supplementary file 1. — 20 µg protein from SV and CCV preparations were assayed by Q Exactive Mass Spectrometer (Thermo Scientific). MS/MS spectra were searched against an IPI mouse database (IPI, Mouse v3) with the ProteinPilot software (Applied Biosystems, USA). Common proteins from two trials are displayed. The identified vATPase (both Vo and V1) subunits are labelled in brown. [file elife-32569-supp1.xlsx]

## Sheet: MS-pooled
Gene names	Full Name/Fasta headers	Intensity ccv	Intensity sv	iBAQ ccv	iBAQ sv	MS/MS Count	id	Peptide IDs	Peptide is razor	Mod. peptide IDs	Evidence IDs	MS/MS IDs	Best MS/MS	Oxidation (M) site IDs	Oxidation (M) site positions
Cltc	>tr|Q5SXR6|Q5SXR6_MOUSE Clathrin heavy chain OS=Mus musculus GN=Cltc PE=1 SV=1;>sp|Q68FD5|CLH1_MOUSE Clathrin heavy chain 1 OS=Mus musculus GN=Cltc PE=1 SV=3	27739000000	239050000	308210000	2656100	3651	646	8;9;35;84;119;122;167;209;246;309;357;491;523;566;629;636;748;797;805;888;908;920;1116;1117;1174;1196;1201;1277;1342;1437;1561;1562;1604;1619;1627;1637;1654;1659;1728;1736;1748;1777;1789;1790;1805;1907;1981;2009;2035;2339;2452;2468;2489;2492;2574;2576;2658;2745;2762;2790;2792;2879;3059;3073;3212;3284;3368;3439;3454;3538;3593;3632;3633;3667;3676;3709;3729;3738	True;True;True;True;True;True;True;True;True;True;True;True;True;True;True;True;True;True;True;True;True;True;True;True;True;True;True;True;True;True;True;True;True;True;True;True;True;True;True;True;True;True;True;True;True;True;True;True;True;True;True;True;True;True;True;True;True;True;True;True;True;True;True;True;True;True;True;True;True;True;True;True;True;True;True;True;True;True	8;9;36;37;89;90;125;126;127;130;131;180;228;268;336;337;387;532;566;610;677;685;808;858;867;958;978;990;1205;1206;1268;1269;1293;1298;1382;1383;1384;1385;1455;1554;1690;1691;1734;1749;1760;1761;1772;1789;1794;1863;1871;1884;1915;1929;1930;1949;2058;2135;2136;2137;2138;2166;2193;2542;2543;2668;2688;2714;2717;2806;2808;2897;2993;3010;3041;3042;3044;3140;3337;3352;3501;3502;3579;3671;3745;3746;3762;…	20;21;22;23;24;25;26;27;28;29;30;31;32;33;34;35;36;37;38;39;40;41;42;43;44;45;46;47;48;49;50;51;52;53;54;55;56;57;58;59;60;61;62;63;64;65;66;67;68;69;70;71;72;73;74;75;76;77;78;79;80;81;82;83;84;85;86;135;136;137;138;139;140;141;142;143;144;145;146;147;148;149;150;151;152;153;154;155;156;157;255;256;257;258;259;260;261;262;263;264;265;266;267;268;269;345;346;347;348;349;350;351;352;353;354;355;35…	35;36;37;38;39;40;41;42;43;44;45;46;47;48;49;50;51;52;53;54;55;56;57;58;59;60;61;62;63;64;65;66;67;68;69;70;71;72;73;74;75;76;77;78;79;80;81;82;83;84;85;86;87;88;89;90;91;92;93;94;95;96;97;98;99;100;101;102;103;104;105;106;107;108;109;110;111;112;113;114;115;116;117;118;119;120;121;122;123;124;125;126;127;128;129;130;131;132;133;134;135;136;137;138;139;140;141;142;143;144;145;146;147;148;149;150;…	63;307;443;827;1082;1281;1475;1697;1815;2087;2365;3046;3197;3370;3578;3598;4320;4749;4861;5283;5384;5417;6230;6264;6448;6530;6610;6907;7147;7428;7958;7971;8095;8131;8219;8267;8326;8332;8517;8535;8568;8731;8858;8863;8906;9331;9706;9845;9944;11191;11594;11686;11852;11883;12241;12249;12663;12935;12995;13165;13175;13493;14157;14522;15150;15539;15994;16289;16461;16832;17280;17426;17450;17576;17690;180…	289;290;291;292;293;294;295;296;297;298;299;300;301;302;303;304;305;306;307;308;309;310	32;55;73;99;108;136;185;268;591;594;608;1000;1142;1306;1318;1320;1336;1382;1383;1596;1600;1607
Ap2b1	>tr|H3BKM0|H3BKM0_MOUSE AP-2 complex subunit beta OS=Mus musculus GN=Ap2b1 PE=4 SV=1;>sp|Q9DBG3|AP2B1_MOUSE AP-2 complex subunit beta OS=Mus musculus GN=Ap2b1 PE=1 SV=1;>sp|Q9DBG3-2|AP2B1_MOUSE Isoform 2 of AP-2 complex subunit beta OS=Mus musculus GN=Ap2b	2722300000	1403000000	64817000	33405000	445	297	25;191;227;228;341;421;450;513;774;860;1076;1370;1546;1666;1683;1710;1769;1776;1900;2104;2133;2185;2232;2279;2428;2513;2534;2627;2705;2781;3002;3552;3768	True;True;True;True;True;True;True;True;True;True;True;True;True;True;True;True;True;True;True;True;True;True;True;True;True;True;True;True;True;True;True;True;True	26;205;206;249;250;370;455;484;485;554;555;835;925;1163;1486;1674;1801;1818;1845;1907;1914;2048;2049;2265;2296;2351;2402;2403;2456;2457;2644;2739;2762;2763;2864;2865;2948;3031;3032;3277;3278;3869;4108	112;113;114;584;585;586;587;588;589;590;591;689;690;691;692;693;694;695;696;915;916;1061;1062;1063;1103;1104;1105;1106;1107;1108;1252;1253;1254;1255;1256;1257;1258;1259;1260;1956;1957;1958;1959;2140;2141;2142;2143;2144;2592;2593;2594;2595;3206;3207;3558;3559;3560;3561;3562;3563;3808;3809;3810;3811;3812;3843;3844;3882;3883;3884;3885;3886;3887;3888;3889;3890;4003;4004;4005;4006;4007;4015;4016;4017;…	350;351;352;1555;1556;1557;1558;1559;1560;1561;1562;1563;1564;1565;1566;1567;1568;1569;1570;1749;1750;1751;1752;1753;1754;1755;1756;1757;1758;1759;1760;1761;1762;1763;1764;1765;1766;1767;1768;2302;2303;2304;2653;2654;2655;2656;2657;2658;2659;2660;2661;2662;2663;2664;2665;2666;2667;2668;2669;2670;2671;2672;2760;2761;2762;2763;2764;2765;2766;2767;2768;2769;2770;3124;3125;3126;3127;3128;3129;3130;31…	351;1565;1760;1767;2303;2668;2766;3130;4646;5169;6089;7238;7845;8346;8398;8468;8683;8695;9267;10173;10335;10505;10725;10900;11539;11952;12125;12454;12823;13066;14001;16871;18318	69;70;71;72;73;74;75;76;77;78;79;80;81	74;83;86;117;137;241;714;716;726;753;771;773;862
Ap2a1	>sp|P17426-2|AP2A1_MOUSE Isoform B of AP-2 complex subunit alpha-1 OS=Mus musculus GN=Ap2a1;>sp|P17426|AP2A1_MOUSE AP-2 complex subunit alpha-1 OS=Mus musculus GN=Ap2a1 PE=1 SV=1	1632500000	1062400000	30801000	20044000	376	408	183;213;270;291;311;387;702;824;846;1073;1346;1504;1611;1837;1990;2373;2374;2378;2515;2645;2661;3024;3159;3300;3443;3521;3522;3724;3750	True;True;True;True;True;True;True;True;True;True;True;True;True;True;True;True;True;True;True;True;True;True;True;True;True;True;True;True;True	196;234;293;294;316;339;418;754;755;887;888;911;1160;1459;1626;1627;1741;1981;2147;2587;2588;2589;2593;2741;2883;2900;3301;3444;3597;3750;3836;3837;4060;4088	562;563;564;565;566;567;568;661;761;762;763;764;765;766;767;768;769;804;805;852;991;992;993;1620;1621;1622;1623;1624;1625;1626;1627;1628;2055;2056;2057;2058;2059;2060;2061;2062;2063;2064;2065;2066;2115;2116;2117;2118;2119;2583;2584;2585;2586;2587;2588;2589;3160;3161;3162;3163;3466;3467;3468;3469;3470;3471;3472;3473;3695;3696;4160;4496;4497;4498;4499;5374;5375;5376;5377;5378;5379;5387;5388;5389;53…	1515;1516;1517;1518;1519;1520;1521;1522;1523;1524;1525;1526;1527;1528;1529;1530;1531;1712;1890;1891;1892;1893;1894;1895;1896;1897;1898;1899;1900;1901;1902;1903;1904;1905;1906;1907;1908;1909;1910;1911;1912;1979;1980;2152;2447;2448;2449;2450;2451;2452;2453;2454;2455;3862;3863;3864;3865;3866;3867;3868;3869;3870;3871;3872;3873;3874;3875;3876;3877;3878;3879;3880;4993;4994;4995;4996;4997;4998;4999;5000…	1527;1712;1892;1980;2152;2453;3869;5001;5105;6067;7152;7702;8115;9006;9765;11342;11349;11362;11960;12500;12671;14086;14810;15645;16317;16779;16780;18069;18252	132;133;134;135;136	143;161;185;754;848
Ap2a2	>sp|P17427|AP2A2_MOUSE AP-2 complex subunit alpha-2 OS=Mus musculus GN=Ap2a2 PE=1 SV=2	1440000000	680390000	28800000	13608000	260	409	153;183;290;700;825;951;1073;1346;1445;1505;1672;1838;2071;2157;2285;2374;2384;2487;2662;2967;3023;3160;3289;3301;3443;3475;3634;3725	True;False;True;True;True;True;False;False;True;True;True;True;True;True;True;False;True;True;True;True;True;True;True;True;False;True;True;True	165;196;315;751;752;889;890;1024;1160;1459;1562;1628;1629;1807;1982;1983;2232;2320;2321;2465;2466;2589;2599;2712;2901;3242;3300;3445;3585;3586;3598;3750;3788;3960;4061	506;507;508;562;563;564;565;566;567;568;800;801;802;803;1609;1610;1611;1612;1613;1614;1615;1616;1617;1618;2067;2068;2069;2070;2071;2072;2073;2074;2075;2076;2326;2327;2328;2329;2330;2331;2583;2584;2585;2586;2587;2588;2589;3160;3161;3162;3163;3348;3349;3350;3351;3352;3353;3354;3355;3356;3474;3475;3476;3477;3478;3479;3480;3481;3482;3824;3825;3826;3827;3828;4161;4162;4163;4164;4664;4665;4840;4841;484…	1434;1435;1436;1437;1515;1516;1517;1518;1519;1520;1521;1522;1523;1524;1525;1526;1527;1528;1529;1530;1531;1973;1974;1975;1976;1977;1978;3845;3846;3847;3848;3849;3850;3851;3852;3853;3854;3855;3856;3857;3858;3859;3860;5020;5021;5022;5023;5024;5025;5026;5027;5028;5029;5030;5031;5032;5033;5034;5035;5036;5037;5038;5039;5040;5041;5556;5557;5558;5559;5560;5561;5562;5563;5564;5565;5566;5567;5568;5569;5570…	1437;1527;1974;3860;5031;5567;6067;7152;7468;7717;8365;9010;10063;10403;10934;11349;11391;11830;12691;13890;14080;14821;15600;15669;16317;16659;17452;18072	137;138;139;140;141;142;143	143;161;185;601;737;831;914
Ap1b1	>sp|O35643|AP1B1_MOUSE AP-1 complex subunit beta-1 OS=Mus musculus GN=Ap1b1 PE=2 SV=2;>tr|Q5SVG5|Q5SVG5_MOUSE AP-1 complex subunit beta-1 OS=Mus musculus GN=Ap1b1 PE=1 SV=1;>tr|Q5SVG4|Q5SVG4_MOUSE AP-1 complex subunit beta-1 OS=Mus musculus GN=Ap1b1 PE=1 S	832990000	85308000	18511000	1895700	105	328	25;225;226;340;439;452;774;883;1077;1369;1547;1666;1711;1768;1776;1862;1899;2113;2133;2186;2232;2279;2428;2488;2534;2781;3003;3466;3551;3768	False;True;True;True;True;True;False;True;True;True;True;False;True;True;False;True;True;True;False;True;False;False;False;True;False;False;True;True;True;False	26;247;248;369;473;487;488;835;951;1164;1485;1675;1801;1846;1906;1914;2009;2047;2276;2296;2352;2402;2403;2456;2457;2644;2713;2762;2763;3031;3032;3279;3775;3868;4108	112;113;114;683;684;685;686;687;688;914;1086;1087;1088;1111;1112;1113;1956;1957;1958;1959;2187;2596;3205;3564;3808;3809;3810;3811;3812;3891;3892;3893;3894;3895;3896;3999;4000;4001;4002;4015;4016;4017;4018;4198;4199;4200;4201;4271;4272;4273;4274;4779;4780;4781;4805;4806;4807;4808;4897;5019;5020;5021;5022;5023;5024;5025;5026;5123;5124;5125;5126;5127;5128;5129;5130;5131;5480;5481;5482;5483;5484;5634…	350;351;352;1740;1741;1742;1743;1744;1745;1746;1747;1748;2301;2712;2713;2714;2715;2716;2717;2718;2719;2720;2721;2722;2723;2724;2775;2776;2777;4646;4647;4648;4649;4650;4651;4652;4653;4654;4655;4656;4657;4658;4659;4660;4661;4662;4663;4664;4665;4666;4667;4668;4669;4670;4671;4672;4673;4674;4675;4676;4677;4678;4679;4680;4681;4682;4683;4684;4685;4686;4687;4688;4689;4690;4691;4692;4693;4694;4695;4696;46…	351;1741;1747;2301;2717;2777;4646;5252;6096;7237;7851;8346;8481;8651;8695;9068;9257;10295;10335;10508;10725;10900;11539;11839;12125;13066;14021;16560;16870;18318	73;74;77;103	74;175;803;892
Ap2m1	>tr|Q3TWV4|Q3TWV4_MOUSE AP-2 complex subunit mu OS=Mus musculus GN=Ap2m1 PE=2 SV=1;>sp|P84091|AP2M1_MOUSE AP-2 complex subunit mu OS=Mus musculus GN=Ap2m1 PE=1 SV=1	551830000	481040000	21224000	18501000	219	590	259;743;744;2062;2305;2399;2486;2679;2776;2807;2927;2968;2969;3139;3281;3658	True;True;True;True;True;True;True;True;True;True;True;True;True;True;True;True	281;802;803;2223;2494;2495;2496;2497;2614;2711;2921;2922;3025;3026;3059;3198;3199;3243;3244;3423;3576;3986;3987	742;1719;1720;1721;1722;1723;1724;1725;1726;1727;1728;1729;1730;1731;1732;1733;1734;1735;1736;1737;1738;1739;1740;1741;1742;1743;1744;4645;4646;4647;4648;4649;5185;5186;5187;5188;5189;5190;5191;5192;5193;5194;5195;5196;5197;5429;5430;5629;6087;6088;6089;6277;6278;6279;6280;6375;6635;6636;6637;6638;6639;6640;6641;6642;6643;6644;6721;6722;6723;6724;6725;6726;6727;7051;7052;7053;7054;7055;7386;7387;…	1850;4062;4063;4064;4065;4066;4067;4068;4069;4070;4071;4072;4073;4074;4075;4076;4077;4078;4079;4080;4081;4082;4083;4084;4085;4086;4087;4088;4089;4090;4091;4092;4093;4094;4095;4096;4097;4098;4099;4100;4101;4102;4103;4104;4105;4106;4107;4108;4109;4110;4111;4112;4113;4114;4115;4116;4117;4118;10033;10034;10035;10036;10037;10038;11005;11006;11007;11008;11009;11010;11011;11012;11013;11014;11015;11016;1…	1850;4068;4118;10035;11005;11441;11818;12739;13053;13264;13735;13894;13901;14751;15505;17524	273;274;275;276;277	1;77;183;273;386
Ap1m1	>sp|P35585|AP1M1_MOUSE AP-1 complex subunit mu-1 OS=Mus musculus GN=Ap1m1 PE=1 SV=3	451420000	0	18057000	0	91	454	116;117;597;814;992;993;1280;1499;1846;2058;2845;2867;2914;3032;3179;3429;3642;3691;3743	True;True;True;True;True;True;True;True;True;True;True;True;True;True;True;True;True;True;True	122;123;644;645;877;1071;1072;1073;1074;1075;1389;1621;1991;2219;3102;3128;3184;3309;3464;3465;3734;3735;3968;4024;4080	342;343;1428;1429;2030;2031;2032;2033;2425;2426;2427;2428;2429;2430;2431;3024;3455;3456;4173;4640;4641;6452;6501;6606;6838;7132;7133;7716;7717;8250;8385;8533	1023;1024;1025;1026;3483;3484;3485;3486;4947;4948;4949;4950;4951;4952;4953;4954;4955;4956;4957;5755;5756;5757;5758;5759;5760;5761;5762;5763;5764;5765;5766;5767;5768;5769;5770;6943;6944;7683;7684;7685;9029;9030;9031;10022;10023;10024;10025;10026;10027;10028;10029;13383;13468;13656;13657;13658;14100;14101;14102;14103;14897;14898;14899;14900;14901;14902;14903;14904;14905;14906;14907;14908;14909;1491…	1024;1026;3485;4951;5766;5770;6943;7684;9030;10026;13383;13468;13657;14102;14905;16185;17471;17866;18238	167;168;169;170;171;172	27;34;38;45;207;265
Ap1g1	>tr|Q8CBB7|Q8CBB7_MOUSE AP-1 complex subunit gamma-1 OS=Mus musculus GN=Ap1g1 PE=2 SV=1;>sp|P22892|AP1G1_MOUSE AP-1 complex subunit gamma-1 OS=Mus musculus GN=Ap1g1 PE=1 SV=3	361220000	0	10321000	0	41	423	312;363;1173;1381;1733;2453;2539;2977;3140;3484;3530;3804	True;True;True;True;True;True;True;True;True;True;True;True	340;394;1267;1497;1868;2669;2670;2768;2769;3252;3424;3797;3845;4145	853;960;961;2776;3225;3926;3927;3928;5526;5527;5528;5529;5530;5767;5768;5769;6737;6738;7056;7057;7058;7059;7906;7907;7908;7909;7978;7979;8642;8643	2153;2390;2391;6442;7275;8523;8524;8525;8526;8527;11601;11602;11603;11604;11605;11606;11607;12141;12142;12143;12144;13915;13916;14755;14756;14757;14758;14759;16679;16680;16681;16682;16683;16684;16685;16686;16687;16798;16799;18409;18410;18411	2153;2390;6442;7275;8525;11602;12142;13915;14757;16682;16798;18410	157;158	231;300
Atp1a3	>sp|Q6PIC6|AT1A3_MOUSE Sodium/potassium-transporting ATPase subunit alpha-3 OS=Mus musculus GN=Atp1a3 PE=1 SV=1;>tr|Q8VCE0|Q8VCE0_MOUSE ATPase, Na+/K+ transporting, alpha 3 polypeptide OS=Mus musculus GN=Atp1a3 PE=2 SV=1	360640000	1829600000	8196300	41583000	275	691	39;395;402;536;562;1031;1161;1171;1357;1935;1936;2051;2338;2358;2483;2591;2624;2625;2731;2780;3333;3359;3389;3473;3788	True;True;True;True;True;True;True;True;True;True;True;True;True;True;True;True;True;True;True;True;True;True;True;True;True	42;43;427;435;579;606;1118;1254;1265;1471;2086;2087;2212;2540;2541;2569;2706;2707;2823;2824;2861;2862;2976;3030;3635;3661;3692;3785;3786;4129	168;169;170;171;172;173;1007;1008;1009;1010;1020;1021;1300;1301;1352;1353;1354;1355;2488;2747;2748;2749;2750;2751;2752;2753;2754;2755;2756;2757;2758;2759;2774;3181;4364;4365;4366;4367;4368;4627;4628;4629;4630;4631;4632;5256;5257;5258;5259;5260;5261;5262;5263;5264;5265;5266;5267;5268;5269;5270;5271;5272;5273;5274;5275;5346;5614;5615;5616;5617;5618;5619;5620;5621;5622;5869;5870;5871;5872;5873;5937;…	585;586;587;588;589;590;591;592;593;594;595;596;597;598;599;600;601;602;603;604;605;606;607;608;609;2543;2544;2545;2546;2547;2548;2549;2550;2551;2552;2553;2565;2566;2567;2568;2569;3254;3255;3256;3257;3258;3259;3260;3344;3345;3346;3347;3348;3349;3350;3351;3352;3353;3354;3355;3356;3357;3358;3359;3360;3361;3362;5871;6380;6381;6382;6383;6384;6385;6386;6387;6388;6389;6390;6391;6392;6393;6394;6395;6396…	586;2546;2566;3260;3352;5871;6394;6440;7188;9474;9475;10010;11143;11301;11793;12317;12432;12446;12895;13064;15818;15956;16059;16653;18379	40;41;42;324;325;326;327	154;168;376;381;605;724;738
Clta	>tr|B1AWE0|B1AWE0_MOUSE Clathrin light chain A OS=Mus musculus GN=Clta PE=1 SV=1;>tr|Q6PFA2|Q6PFA2_MOUSE Clathrin light chain A OS=Mus musculus GN=Clta PE=2 SV=1;>tr|B1AWE1|B1AWE1_MOUSE Clathrin light chain A OS=Mus musculus GN=Clta PE=1 SV=1;>tr|B1AWD8|B1	275990000	0	39427000	0	22	92	6;673;1816;2110;3070	True;True;True;True;True	6;722;1960;2273;3349	16;17;1567;1568;1569;1570;4130;4775;4776;6924	28;29;30;31;32;3754;3755;3756;3757;3758;3759;3760;3761;3762;3763;8962;8963;10288;10289;10290;14487;14488;14489	29;3759;8962;10288;14488
Atp6v1a	>sp|P50516|VATA_MOUSE V-type proton ATPase catalytic subunit A OS=Mus musculus GN=Atp6v1a PE=1 SV=2;>sp|P50516-2|VATA_MOUSE Isoform 2 of V-type proton ATPase catalytic subunit A OS=Mus musculus GN=Atp6v1a	233480000	1360000000	6867100	40001000	289	484	52;151;160;368;389;473;580;637;654;854;927;1104;1145;1167;1215;1218;1749;1775;2063;2578;2579;2813;3102;3149;3328;3330;3444;3451	True;True;True;True;True;True;True;True;True;True;True;True;True;True;True;True;True;True;True;True;True;True;True;True;True;True;True;True	56;57;163;172;399;420;421;509;510;626;686;703;919;997;998;1192;1236;1261;1312;1315;1885;1886;1913;2224;2810;2811;3065;3066;3382;3383;3433;3434;3628;3629;3630;3632;3751;3759	192;193;194;195;196;197;503;518;968;996;997;998;999;1144;1145;1383;1384;1385;1386;1387;1388;1389;1390;1391;1392;1393;1394;1395;1396;1397;1398;1399;1400;1401;1497;1498;1529;1530;1531;1532;1533;1534;1535;1536;1537;1538;1539;2131;2132;2281;2282;2283;2284;2285;2286;2641;2642;2718;2719;2720;2721;2722;2769;2871;2872;2873;2874;2878;2879;2880;3962;3963;3964;3965;3966;4014;4650;4651;5838;5839;5840;6385;63…	654;655;656;657;658;659;660;661;662;663;664;665;666;1431;1449;2409;2463;2464;2465;2466;2467;2468;2469;2470;2471;2472;2473;2474;2475;2476;2477;2478;2479;2480;2481;2482;2483;2484;2485;2486;2487;2488;2489;2490;2491;2492;2493;2494;2495;2496;2497;2498;2499;2500;2501;2502;2503;2504;2505;2506;2507;2508;2509;2510;2511;2512;2513;2514;2515;2516;2517;2518;2519;2520;2521;2522;2523;2524;2525;2526;2527;2528;25…	660;1431;1449;2409;2470;2839;3428;3628;3705;5140;5461;6187;6330;6433;6654;6669;8586;8694;10039;12252;12254;13279;14634;14784;15796;15811;16386;16429	185;186;187;188;189;190;191;192;193;194;195	95;205;296;318;346;347;368;540;544;550;608
Syt1	>sp|P46096|SYT1_MOUSE Synaptotagmin-1 OS=Mus musculus GN=Syt1 PE=1 SV=1	225800000	2130600000	10752000	101460000	631	466	364;497;1190;1191;1332;2121;2200;2271;2527;2788;3209;3222;3427;3428;3436;3556;3567;3577	True;True;True;True;True;True;True;True;True;True;True;True;True;True;True;True;True;True	395;538;1287;1288;1444;1445;2284;2367;2445;2446;2754;3039;3498;3512;3513;3732;3733;3742;3875;3876;3888;3898	962;963;1225;2817;2818;2819;2820;2821;2822;3131;3132;3133;3134;3135;3136;3137;3138;3139;3140;4791;4920;4921;4922;4923;4924;4925;4926;4927;4928;4929;4930;4931;4932;4933;4934;4935;4936;4937;4938;4939;4940;4941;4942;4943;4944;4945;4946;4947;4948;4949;4950;4951;4952;4953;4954;4955;4956;4957;4958;4959;4960;4961;4962;4963;4964;4965;4966;4967;4968;5098;5099;5100;5101;5102;5103;5104;5105;5106;5733;5734;5…	2392;2393;3076;6513;6514;6515;6516;6517;6518;6519;6520;7114;7115;7116;7117;7118;7119;7120;7121;7122;7123;7124;7125;7126;7127;7128;10307;10538;10539;10540;10541;10542;10543;10544;10545;10546;10547;10548;10549;10550;10551;10552;10553;10554;10555;10556;10557;10558;10559;10560;10561;10562;10563;10564;10565;10566;10567;10568;10569;10570;10571;10572;10573;10574;10575;10576;10577;10578;10579;10580;10581…	2392;3076;6516;6520;7123;10307;10551;10866;12078;13120;15089;15231;16175;16178;16214;16918;16951;17043	55;56;176;177;178	173;226;247;302;393
Vamp2	>tr|B0QZN5|B0QZN5_MOUSE Vesicle-associated membrane protein 2 OS=Mus musculus GN=Vamp2 PE=4 SV=1;>sp|P63044|VAMP2_MOUSE Vesicle-associated membrane protein 2 OS=Mus musculus GN=Vamp2 PE=1 SV=2	182720000	811290000	20302000	90144000	147	74	32;2107;2130;2770;2847	True;True;True;True;True	33;2269;2270;2293;3018;3019;3104	124;125;126;127;128;129;130;131;132;4733;4734;4735;4736;4737;4738;4739;4740;4741;4742;4743;4744;4745;4746;4747;4748;4749;4750;4751;4752;4753;4754;4755;4756;4757;4758;4759;4760;4761;4762;4763;4764;4765;4766;4767;4768;4769;4770;4802;6268;6269;6270;6454;6455;6456;6457	369;370;371;372;373;374;375;376;377;378;379;380;381;382;383;384;385;386;387;388;389;390;391;392;393;10177;10178;10179;10180;10181;10182;10183;10184;10185;10186;10187;10188;10189;10190;10191;10192;10193;10194;10195;10196;10197;10198;10199;10200;10201;10202;10203;10204;10205;10206;10207;10208;10209;10210;10211;10212;10213;10214;10215;10216;10217;10218;10219;10220;10221;10222;10223;10224;10225;10226…	372;10203;10328;13039;13391	20	46
Ap2s1	>sp|P62743|AP2S1_MOUSE AP-2 complex subunit sigma OS=Mus musculus GN=Ap2s1 PE=1 SV=1	174380000	120690000	29063000	20115000	109	536	845;1312;1931;2655;3693;3694	True;True;True;True;True;True	910;1422;2082;2893;2894;4026;4027;4028	2112;2113;2114;3084;3085;3086;3087;3088;3089;4355;4356;4357;4358;4359;4360;6038;6039;6040;6041;8387;8388;8389;8390;8391	5098;5099;5100;5101;5102;7027;7028;7029;7030;7031;7032;7033;7034;9410;9411;9412;9413;9414;9415;9416;9417;9418;9419;9420;9421;9422;9423;9424;9425;9426;9427;9428;9429;9430;9431;9432;9433;9434;9435;9436;9437;9438;9439;9440;9441;9442;9443;9444;9445;9446;9447;9448;9449;9450;9451;9452;9453;9454;9455;9456;9457;9458;9459;9460;9461;9462;9463;9464;9465;9466;9467;9468;9469;12643;12644;12645;12646;12647;1264…	5099;7031;9413;12651;17872;17895	232;233	21;137
Syp	>sp|Q62277|SYPH_MOUSE Synaptophysin OS=Mus musculus GN=Syp PE=1 SV=2	154110000	625080000	12842000	52090000	47	670	750;2261;2317;3130;3635	True;True;True;True;True	810;811;2434;2435;2510;2511;3413;3961	1915;1916;1917;1918;5075;5076;5077;5078;5079;5080;5081;5082;5083;5218;5219;5220;7027;7028;7029;7030;7031;7032;7033;7034;7035;7036;7037;8239;8240	4587;4588;4589;4590;4591;4592;4593;4594;4595;10807;10808;10809;10810;10811;10812;10813;10814;10815;10816;10817;10818;10819;10820;10821;10822;11055;11056;11057;11058;11059;14711;14712;14713;14714;14715;14716;14717;14718;14719;14720;14721;14722;14723;14724;14725;14726;17453;17454;17455	4589;10815;11055;14721;17455	317;318;319;320	1;7;170;234
Atp6v0a1	>tr|K3W4T3|K3W4T3_MOUSE V-type proton ATPase subunit a OS=Mus musculus GN=Atp6v0a1 PE=1 SV=1;>sp|Q9Z1G4-3|VPP1_MOUSE Isoform A1-III of V-type proton ATPase 116 kDa subunit a isoform 1 OS=Mus musculus GN=Atp6v0a1;>sp|Q9Z1G4-2|VPP1_MOUSE Isoform A1-I of V-ty	128450000	2126900000	3777800	62557000	371	305	215;457;474;658;873;940;1147;1255;1361;1387;1626;1875;1920;2171;2337;2411;2593;2751;2777;3062;3273	True;True;True;True;True;True;True;True;True;True;True;True;True;True;True;True;True;True;True;True;True	236;237;493;511;512;707;939;1012;1238;1355;1476;1477;1503;1758;1759;2023;2071;2336;2539;2626;2826;2999;3027;3341;3567;3568	663;664;665;666;667;668;669;670;1122;1123;1124;1146;1147;1148;1149;1150;1151;1152;1153;1154;1155;1156;1157;1158;1159;1160;1161;1162;1163;1164;1165;1166;1167;1168;1169;1170;1171;1172;1173;1174;1175;1176;1177;1178;1179;1180;1181;1182;1183;1548;2163;2164;2165;2309;2310;2311;2725;2726;2727;2953;2954;2955;3187;3188;3189;3190;3191;3192;3193;3194;3232;3723;3724;3725;3726;3727;3728;3729;3730;3731;4234;42…	1714;1715;1716;1717;1718;1719;1720;1721;1722;1723;1724;2790;2791;2792;2793;2794;2795;2796;2797;2798;2799;2800;2801;2802;2803;2804;2805;2806;2807;2841;2842;2843;2844;2845;2846;2847;2848;2849;2850;2851;2852;2853;2854;2855;2856;2857;2858;2859;2860;2861;2862;2863;2864;2865;2866;2867;2868;2869;2870;2871;2872;2873;2874;2875;2876;2877;2878;2879;2880;2881;2882;2883;2884;2885;2886;2887;2888;2889;2890;2891…	1718;2794;2847;3723;5200;5531;6351;6801;7198;7287;8186;9177;9385;10474;11115;11490;12332;12952;13056;14410;15492	87;88;89;90	80;94;160;270
Cltb	>sp|Q6IRU5|CLCB_MOUSE Clathrin light chain B OS=Mus musculus GN=Cltb PE=1 SV=1;>sp|Q6IRU5-2|CLCB_MOUSE Isoform 2 of Clathrin light chain B OS=Mus musculus GN=Cltb;>tr|F7BHJ0|F7BHJ0_MOUSE Clathrin light chain B (Fragment) OS=Mus musculus GN=Cltb PE=4 SV=1;>	114240000	430330	12693000	47814	84	679	89;441;603;1634;2089;2193;2194;2769;3374;3605	True;True;True;True;True;True;True;True;True;True	95;475;651;1769;2250;2360;2361;3017;3677;3927	276;277;278;279;280;281;282;283;284;285;286;287;288;289;290;291;1091;1092;1439;3746;3747;4691;4910;4911;6265;6266;6267;7615;8168	858;859;860;861;862;863;864;865;866;867;868;869;870;871;872;873;874;875;876;877;878;879;880;881;882;883;884;885;886;887;888;889;890;891;892;893;894;895;896;897;898;899;900;901;902;903;904;905;906;907;908;909;910;911;912;913;914;915;916;917;918;919;920;921;2727;2728;2729;3503;8250;8251;10108;10524;10525;10526;10527;13027;13028;13029;13030;13031;13032;13033;16025;17302;17303	865;2727;3503;8251;10108;10525;10527;13029;16025;17302
Atp6v0d1	>sp|P51863|VA0D1_MOUSE V-type proton ATPase subunit d 1 OS=Mus musculus GN=Atp6v0d1 PE=1 SV=2	83117000	569510000	5194800	35595000	99	490	78;346;820;1371;1912;1987;2249;2532;2916	True;True;True;True;True;True;True;True;True	83;375;883;1487;2063;2144;2420;2760;3186	234;235;236;237;238;239;240;241;242;243;926;927;2048;3208;3209;4327;4328;4329;4330;4488;4489;4490;4491;5050;5051;5052;5746;5747;5748;5749;6608	720;721;722;723;724;725;726;727;728;729;730;731;732;733;734;735;736;737;738;739;740;741;742;743;744;745;746;747;748;749;750;751;752;753;754;755;756;757;758;759;760;761;762;763;764;765;2319;2320;4975;7240;7241;9349;9350;9351;9352;9353;9354;9355;9356;9357;9358;9359;9360;9361;9362;9363;9364;9365;9366;9367;9368;9369;9370;9371;9372;9747;9748;9749;9750;9751;9752;10769;10770;10771;10772;10773;10774;1077…	740;2319;4975;7241;9356;9751;10774;12104;13660
Sv2b	>sp|Q8BG39|SV2B_MOUSE Synaptic vesicle glycoprotein 2B OS=Mus musculus GN=Sv2b PE=1 SV=1	72139000	586330000	2885600	23453000	76	726	38;490;869;1188;1318;3434;3791	True;True;True;True;True;True;True	40;41;531;934;935;1283;1284;1428;3740;4132	160;161;162;163;164;165;166;167;1213;1214;1215;1216;2158;2159;2797;2798;2799;2800;2801;2802;2803;2804;3099;3100;3101;3102;7730;7731;8622;8623	561;562;563;564;565;566;567;568;569;570;571;572;573;574;575;576;577;578;579;580;581;582;583;584;3039;3040;3041;3042;3043;3044;5191;5192;5193;6472;6473;6474;6475;6476;6477;6478;6479;6480;6481;6482;6483;6484;6485;6486;6487;6488;6489;6490;6491;7045;7046;7047;7048;7049;7050;7051;7052;7053;7054;7055;7056;7057;7058;7059;7060;7061;7062;16202;16203;16204;18383;18384	574;3042;5193;6476;7046;16203;18384	16;345	81;315
Sv2a	>sp|Q9JIS5|SV2A_MOUSE Synaptic vesicle glycoprotein 2A OS=Mus musculus GN=Sv2a PE=1 SV=1	67524000	480570000	2597100	18483000	61	913	510;599;810;1026;1189;1261;3173;3433	True;True;True;True;True;True;True;True	551;647;872;1113;1285;1286;1361;3458;3739	1242;1243;1244;1245;1246;1247;1248;1431;1432;2017;2479;2805;2806;2807;2808;2809;2810;2811;2812;2813;2814;2815;2816;2964;2965;2966;2967;2968;7123;7124;7125;7725;7726;7727;7728;7729	3106;3107;3108;3109;3110;3111;3112;3113;3114;3115;3116;3117;3118;3119;3489;3490;3491;4910;5854;6492;6493;6494;6495;6496;6497;6498;6499;6500;6501;6502;6503;6504;6505;6506;6507;6508;6509;6510;6511;6512;6820;6821;6822;6823;6824;6825;14874;14875;14876;14877;14878;14879;14880;14881;14882;14883;14884;16197;16198;16199;16200;16201	3111;3490;4910;5854;6504;6820;14878;16198	390	372
Atp1b1	>sp|P14094|AT1B1_MOUSE Sodium/potassium-transporting ATPase subunit beta-1 OS=Mus musculus GN=Atp1b1 PE=1 SV=1	55305000	278790000	4608800	23233000	32	390	345;1656;3082;3373;3448;3498	True;True;True;True;True;True	374;1791;3362;3676;3755;3756;3813	924;925;3794;6949;6950;7612;7613;7614;7790;7791;7792;7793;7937;7938	2317;2318;8329;14556;14557;14558;14559;14560;14561;14562;14563;14564;16015;16016;16017;16018;16019;16020;16021;16022;16023;16024;16414;16415;16416;16417;16418;16419;16420;16421;16422;16731;16732	2317;8329;14560;16016;16417;16731	126	233
Atp1a1	>sp|Q8VDN2|AT1A1_MOUSE Sodium/potassium-transporting ATPase subunit alpha-1 OS=Mus musculus GN=Atp1a1 PE=1 SV=1	54531000	441130000	1185500	9589800	56	793	40;303;314;352;402;477;729;1068;1161;1596;1935;1936;2050;2138;2347;2483;2591;2624;2625;2976;3280;3389;3473;3733	True;True;True;True;False;True;True;True;False;True;False;False;True;True;True;False;False;False;False;True;True;False;False;True	44;329;342;381;435;517;518;787;1155;1254;1726;2086;2087;2211;2301;2554;2555;2706;2707;2823;2824;2861;2862;3251;3575;3692;3785;3786;4069	174;828;855;856;857;936;937;1020;1021;1190;1191;1685;1686;2575;2747;2748;2749;2750;2751;2752;2753;2754;2755;2756;2757;2758;2759;3663;4364;4365;4366;4367;4368;4623;4624;4625;4626;4815;4816;4817;5309;5310;5311;5312;5313;5614;5615;5616;5617;5618;5619;5620;5621;5622;5869;5870;5871;5872;5873;5937;5938;5939;5940;5941;5942;5943;5944;5945;5946;5947;6736;7385;7640;7881;7882;7883;7884;7885;7886;7887;7888;8…	610;2019;2020;2156;2157;2158;2159;2160;2332;2333;2334;2335;2336;2565;2566;2567;2568;2569;2979;2980;2981;2982;2983;2984;2985;2986;2987;2988;2989;2990;2991;2992;2993;3979;3980;6010;6380;6381;6382;6383;6384;6385;6386;6387;6388;6389;6390;6391;6392;6393;6394;6395;6396;6397;6398;6399;6400;6401;6402;6403;6404;6405;6406;6407;6408;6409;6410;6411;6412;6413;6414;6415;6416;6417;6418;6419;6420;6421;8072;8073;…	610;2019;2156;2334;2566;2988;3979;6010;6394;8073;9474;9475;10002;10351;11241;11793;12317;12432;12446;13913;15503;16059;16653;18145	40;41;42;356;357;358	164;178;615;673;734;748
Ap1s1	>sp|P61967|AP1S1_MOUSE AP-1 complex subunit sigma-1A OS=Mus musculus GN=Ap1s1 PE=1 SV=1;>tr|D3Z268|D3Z268_MOUSE AP-1 complex subunit sigma-1A (Fragment) OS=Mus musculus GN=Ap1s1 PE=4 SV=1;>tr|D3Z0D6|D3Z0D6_MOUSE AP-1 complex subunit sigma-1A (Fragment) OS=	53058000	0	5305800	0	11	523	131;685;3069;3692	True;True;True;True	140;735;736;3348;4025	450;1590;1591;6923;8386	1314;1315;1316;3799;3800;3801;3802;3803;14485;14486;17871	1315;3803;14486;17871	226;227	36;155
Epn1	>sp|Q80VP1|EPN1_MOUSE Epsin-1 OS=Mus musculus GN=Epn1 PE=1 SV=3;>sp|Q80VP1-2|EPN1_MOUSE Isoform 2 of Epsin-1 OS=Mus musculus GN=Epn1	47704000	0	3669500	0	17	717	211;268;1722;1723;2430;3101;3252	True;True;True;True;True;True;True	231;291;1857;1858;2646;3381;3546	656;657;658;759;3912;3913;5487;5488;5489;6981;7333	1705;1706;1707;1708;1709;1887;1888;8507;8508;8509;11543;11544;11545;14630;14631;14632;15412	1708;1887;8507;8508;11544;14631;15412
Atp6v1b2	>sp|P62814|VATB2_MOUSE V-type proton ATPase subunit B, brain isoform OS=Mus musculus GN=Atp6v1b2 PE=1 SV=1	45455000	753340000	1818200	30134000	201	542	335;337;1016;1320;1621;2410;2415;2646;2760;2804;2907;3264;3336;3340;3698	True;True;True;True;True;True;True;True;True;True;True;True;True;True;True	364;366;1100;1101;1430;1751;1752;1753;2625;2630;2631;2884;3008;3056;3173;3558;3638;3642;4032	901;902;903;904;905;907;908;909;910;2458;2459;2460;2461;2462;2463;2464;2465;3108;3109;3110;3111;3709;3710;3711;3712;3713;3714;3715;3716;5446;5447;5448;5461;5462;5990;5991;5992;5993;5994;6246;6247;6372;6581;6582;7354;7355;7523;7524;7525;7534;7535;7536;7537;7538;8411;8412;8413;8414;8415	2258;2259;2260;2261;2262;2263;2264;2265;2266;2267;2268;2269;2270;2271;2272;2273;2274;2275;2279;2280;2281;2282;2283;2284;2285;2286;2287;2288;2289;2290;2291;2292;2293;2294;2295;2296;5802;5803;5804;5805;5806;5807;5808;5809;5810;5811;5812;5813;5814;5815;5816;5817;5818;5819;5820;5821;5822;5823;5824;5825;5826;5827;5828;5829;5830;5831;5832;5833;5834;7074;7075;7076;7077;7078;7079;7080;7081;7082;7083;7084…	2260;2284;5818;7077;8145;11474;11510;12508;12969;13261;13622;15450;15828;15864;17978	234;235;236;237	169;180;327;356
Clvs2	>sp|Q8BG92|CLVS2_MOUSE Clavesin-2 OS=Mus musculus GN=Clvs2 PE=2 SV=1;>sp|Q8BG92-2|CLVS2_MOUSE Isoform 2 of Clavesin-2 OS=Mus musculus GN=Clvs2	41780000	0	2457700	0	13	727	478;837;1758;1829;1964;3112	True;True;True;True;True;True	519;902;1895;1973;2117;3395	1192;2099;3977;3978;4147;4148;4430;7003;7004	2994;5080;8601;8602;8603;8604;8605;8985;8986;9611;14669;14670;14671	2994;5080;8602;8985;9611;14671	346	37
G3bp2	>sp|P97379|G3BP2_MOUSE Ras GTPase-activating protein-binding protein 2 OS=Mus musculus GN=G3bp2 PE=1 SV=2;>sp|P97379-2|G3BP2_MOUSE Isoform B of Ras GTPase-activating protein-binding protein 2 OS=Mus musculus GN=G3bp2	38943000	0	1770100	0	22	595	87;885;964;2075;2464;2524;3536;3779	True;True;True;True;True;True;True;True	93;953;954;1037;1038;2236;2683;2751;3852;3853;4119	272;2189;2190;2357;2358;4671;4672;4673;4674;5552;5724;7997;7998;7999;8597	854;5258;5259;5260;5261;5611;5612;10071;10072;10073;10074;10075;10076;10077;11640;11641;11642;11643;12024;16826;16827;16828;18346;18347	854;5260;5611;10072;11640;12024;16827;18347	278;279	3;109
Ap1s2	>sp|Q9DB50|AP1S2_MOUSE AP-1 complex subunit sigma-2 OS=Mus musculus GN=Ap1s2 PE=2 SV=1	37758000	0	3775800	0	5	887	130;697;3695	True;True;True	139;748;4029	449;1605;8392	1312;1313;3840;3841;17896	1312;3841;17896
Hspa1a;Hspa1b	>sp|Q61696|HS71A_MOUSE Heat shock 70 kDa protein 1A OS=Mus musculus GN=Hspa1a PE=1 SV=2;>sp|P17879|HS71B_MOUSE Heat shock 70 kDa protein 1B OS=Mus musculus GN=Hspa1b PE=1 SV=3	37158000	0	1126000	0	22	412	245;279;356;644;827;1331;1457;2020;2222;2223;2380;2507;2700;2881;3318;3404	True;True;True;True;True;True;True;True;True;True;True;True;False;True;False;False	267;303;386;693;892;1443;1574;2178;2392;2393;2595;2732;2943;3142;3143;3617;3707	719;782;949;1508;2085;3130;3381;4560;5006;5007;5393;5674;6130;6131;6522;6523;6524;7478;7479;7480;7481;7663;7664;7665	1814;1943;2360;2361;2362;2363;3642;3643;5061;7113;7524;7525;9906;10699;10700;11367;11921;12794;12795;12796;12797;12798;12799;12800;12801;12802;12803;12804;12805;12806;12807;12808;13505;13506;13507;13508;13509;15729;15730;15731;15732;15733;15734;15735;15736;16096;16097;16098;16099;16100	1814;1943;2361;3643;5061;7113;7525;9906;10699;10700;11367;11921;12804;13508;15735;16100	144	122
Picalm	>sp|Q7M6Y3-5|PICAL_MOUSE Isoform 5 of Phosphatidylinositol-binding clathrin assembly protein OS=Mus musculus GN=Picalm;>sp|Q7M6Y3-2|PICAL_MOUSE Isoform 2 of Phosphatidylinositol-binding clathrin assembly protein OS=Mus musculus GN=Picalm;>sp|Q7M6Y3-3|PICAL	36690000	0	1467600	0	2	704	297;850;985;1574;1692;1848;2394;2526;2703;2901;2946;3013;3045;3261;3317;3363	False;False;False;False;False;False;False;False;False;False;False;False;True;False;False;False	323;915;1063;1703;1827;1993;2609;2753;2946;3166;3167;3219;3220;3289;3323;3555;3616;3666	816;817;818;819;2123;2124;2125;2126;2127;2403;2404;2405;2406;2407;3626;3627;3628;3629;3630;3855;4175;4176;4177;5421;5726;5727;5728;5729;5730;5731;5732;6138;6570;6571;6572;6573;6684;6685;6805;6806;6807;6853;7350;7476;7477;7598	1998;1999;2000;2001;2002;2003;2004;2005;2006;2007;2008;2009;5127;5128;5129;5130;5131;5132;5133;5705;5706;5707;5708;5709;8015;8016;8017;8018;8019;8020;8411;9033;9034;9035;9036;9037;9038;9039;9040;9041;11431;12026;12027;12028;12029;12030;12031;12032;12033;12034;12035;12036;12037;12038;12039;12040;12041;12042;12043;12044;12045;12046;12047;12048;12049;12050;12051;12052;12053;12054;12055;12056;12057;1…	2002;5128;5708;8019;8411;9034;11431;12038;12820;13605;13842;14042;14131;15442;15722;15979	332;333	86;120
Atp6v1e1	>sp|P50518|VATE1_MOUSE V-type proton ATPase subunit E 1 OS=Mus musculus GN=Atp6v1e1 PE=1 SV=2	31858000	333890000	2450600	25684000	31	485	57;254;1273;1545;1799;2602;3790	True;True;True;True;True;True;True	62;276;1375;1376;1377;1672;1673;1939;1940;2835;4131	204;733;734;735;2991;2992;2993;2994;3556;3557;4093;4094;4095;4096;5887;8621	674;1834;1835;1836;1837;1838;1839;1840;1841;1842;6851;6852;6853;6854;6855;6856;7840;7841;8881;8882;8883;8884;8885;8886;8887;8888;8889;8890;8891;12351;18382	674;1838;6856;7840;8885;12351;18382	196;197;198;199;200	15;16;76;207;208
Atp6v1h	>tr|A0A0A6YX18|A0A0A6YX18_MOUSE V-type proton ATPase subunit H OS=Mus musculus GN=Atp6v1h PE=4 SV=1;>sp|Q8BVE3|VATH_MOUSE V-type proton ATPase subunit H OS=Mus musculus GN=Atp6v1h PE=1 SV=1;>tr|A0A0A6YWP6|A0A0A6YWP6_MOUSE V-type proton ATPase subunit H OS=	27928000	544100000	1117100	21764000	67	20	731;975;1450;1871;1985;2042;2605;2668;2822;2827;3033;3138;3589;3701;3767;3771	True;True;True;True;True;True;True;True;True;True;True;True;True;True;True;True	789;790;1052;1567;2018;2142;2202;2203;2839;2907;2908;3075;3082;3310;3311;3422;3911;4035;4107;4111	1688;1689;1690;1691;2386;3364;4224;4225;4480;4481;4482;4599;4600;4601;4602;5892;6068;6069;6070;6404;6423;6839;6840;7049;7050;8139;8140;8420;8581;8586;8587	3982;3983;3984;3985;3986;3987;5670;5671;7489;7490;9151;9152;9153;9154;9155;9156;9157;9158;9725;9726;9727;9728;9729;9730;9731;9732;9733;9734;9735;9965;9966;9967;9968;9969;12357;12708;12709;12710;12711;12712;12713;12714;13297;13318;13319;13320;14104;14105;14106;14107;14108;14747;14748;17263;17264;17265;17266;17985;18317;18322;18323;18324;18325;18326;18327;18328;18329	3983;5670;7490;9156;9731;9966;12357;12713;13297;13319;14105;14748;17265;17985;18317;18327	6;7;8;9	96;129;423;442
Clvs1	>sp|Q9D4C9|CLVS1_MOUSE Clavesin-1 OS=Mus musculus GN=Clvs1 PE=2 SV=1;>sp|Q9D4C9-2|CLVS1_MOUSE Isoform 2 of Clavesin-1 OS=Mus musculus GN=Clvs1	26121000	0	1374800	0	9	878	475;1758;1828;1965;3112	True;False;True;True;False	513;514;1895;1972;2118;3395	1184;1185;3977;3978;4145;4146;4431;4432;7003;7004	2967;2968;2969;8601;8602;8603;8604;8605;8982;8983;8984;9612;9613;9614;14669;14670;14671	2968;8602;8983;9612;14671	387	59
Epn2	>tr|Q5NCM5|Q5NCM5_MOUSE Epsin-2 OS=Mus musculus GN=Epn2 PE=1 SV=1;>tr|J3QNT7|J3QNT7_MOUSE Epsin-2 OS=Mus musculus GN=Epn2 PE=1 SV=1;>tr|Q5NCM6|Q5NCM6_MOUSE Epsin-2 OS=Mus musculus GN=Epn2 PE=1 SV=1;>sp|Q8CHU3-2|EPN2_MOUSE Isoform 2 of Epsin-2 OS=Mus muscul	24622000	0	984890	0	12	303	369;709;1142;2102;2258;2432;2666;3144	True;True;True;True;True;True;True;True	400;765;1233;2263;2430;2648;2905;3428	969;1653;1654;2713;4726;5070;5491;5492;6066;7064	2410;3933;3934;3935;6322;10170;10802;11547;11548;11549;12706;14767	2410;3935;6322;10170;10802;11548;12706;14767
Ncl	>sp|P09405|NUCL_MOUSE Nucleolin OS=Mus musculus GN=Ncl PE=1 SV=2	21075000	0	585420	0	5	374	785;3220;3403	True;True;True	846;3510;3706	1975;7250;7251;7661;7662	4727;4728;15218;15219;16094;16095	4727;15219;16094
Ocrl	>sp|Q6NVF0-2|OCRL_MOUSE Isoform 2 of Inositol polyphosphate 5-phosphatase OCRL-1 OS=Mus musculus GN=Ocrl;>sp|Q6NVF0|OCRL_MOUSE Inositol polyphosphate 5-phosphatase OCRL-1 OS=Mus musculus GN=Ocrl PE=1 SV=1;>tr|F7CAV3|F7CAV3_MOUSE Inositol polyphosphate 5-ph	21067000	0	554390	0	7	681	74;1057;2070;2278	True;True;True;True	79;1144;2231;2455	229;230;2554;4663;5122	714;715;5982;10061;10062;10885;10886;10887	715;5982;10061;10886
Vamp4	>tr|Q8BSN6|Q8BSN6_MOUSE Vesicle-associated membrane protein 4 OS=Mus musculus GN=Vamp4 PE=2 SV=1;>sp|O70480|VAMP4_MOUSE Vesicle-associated membrane protein 4 OS=Mus musculus GN=Vamp4 PE=1 SV=1;>tr|A0A0A6YY66|A0A0A6YY66_MOUSE Vesicle-associated membrane pro	19743000	0	3290500	0	8	344	1259;1321;2754;2873	True;True;True;True	1359;1431;1432;3002;3134	2962;3112;3113;3114;6239;6508	6815;7090;7091;7092;7093;7094;12961;13475	6815;7093;12961;13475	105	67
Hspa2	>sp|P17156|HSP72_MOUSE Heat shock-related 70 kDa protein 2 OS=Mus musculus GN=Hspa2 PE=1 SV=2	19720000	0	563430	0	12	405	256;355;643;802;811;1454;1455;2019;2366;2367;2383;2508;3031;3135;3318;3404;3574	False;True;True;True;False;False;False;False;True;True;True;True;False;True;False;False;True	278;385;692;864;873;1571;1572;2177;2579;2580;2598;2733;3308;3419;3617;3707;3895	737;738;739;948;1507;1997;2018;2019;2020;2021;2022;2023;3369;3370;3371;3372;3373;3374;3375;3376;3377;3378;3379;4558;4559;5365;5366;5396;5675;6835;6836;6837;7045;7478;7479;7480;7481;7663;7664;7665;8082	1844;1845;1846;1847;2359;3641;4765;4911;4912;4913;4914;4915;4916;4917;4918;4919;4920;4921;4922;4923;4924;4925;4926;4927;4928;4929;7499;7500;7501;7502;7503;7504;7505;7506;7507;7508;7509;7510;7511;7512;7513;7514;7515;7516;7517;7518;7519;7520;7521;7522;9900;9901;9902;9903;9904;9905;11325;11326;11371;11922;11923;14096;14097;14098;14099;14740;14741;14742;15729;15730;15731;15732;15733;15734;15735;15736…	1846;2359;3641;4765;4921;7505;7518;9904;11325;11326;11371;11923;14096;14741;15735;16100;16977
Gnl1	>sp|P36916|GNL1_MOUSE Guanine nucleotide-binding protein-like 1 OS=Mus musculus GN=Gnl1 PE=2 SV=4;>sp|P36916-2|GNL1_MOUSE Isoform 2 of Guanine nucleotide-binding protein-like 1 OS=Mus musculus GN=Gnl1	16185000	0	522090	0	11	459	174;732;772;1538;2162;2660;2735;2886;3018;3719	True;True;True;True;True;True;True;True;True;True	187;791;833;1665;2326;2899;2982;3148;3294;4055	552;1692;1693;1952;3546;4851;6050;6202;6532;6815;8455	1503;3988;3989;4639;4640;7818;7819;10427;12670;12906;13524;14064;18052	1503;3989;4639;7819;10427;12670;12906;13524;14064;18052
Atp6v0c	>tr|D3Z3B2|D3Z3B2_MOUSE V-type proton ATPase 16 kDa proteolipid subunit (Fragment) OS=Mus musculus GN=Atp6v0c PE=3 SV=1;>tr|E9Q9C5|E9Q9C5_MOUSE V-type proton ATPase 16 kDa proteolipid subunit (Fragment) OS=Mus musculus GN=Atp6v0c PE=3 SV=1;>sp|P63082|VATL_	15752000	185210000	3150300	37041000	19	165	2909	TRUE	3176;3177;3178;3179	6588;6589;6590;6591;6592;6593;6594;6595;6596;6597;6598;6599;6600;6601	13630;13631;13632;13633;13634;13635;13636;13637;13638;13639;13640;13641;13642;13643;13644;13645;13646;13647;13648	13647	52;53;54	50;53;59
Eif3a	>sp|P23116|EIF3A_MOUSE Eukaryotic translation initiation factor 3 subunit A OS=Mus musculus GN=Eif3a PE=1 SV=5	15640000	0	269660	0	3	424	172;2196;2247	True;True;True	185;2363;2418	550;4913;4914;5048	1501;10529;10530;10767	1501;10530;10767
G3bp1	>sp|P97855|G3BP1_MOUSE Ras GTPase-activating protein-binding protein 1 OS=Mus musculus GN=G3bp1 PE=1 SV=1	15476000	0	703440	0	12	598	382;963;1282;2074;2463;2720;3049;3536	True;True;True;True;True;True;True;False	413;1036;1391;2235;2682;2965;3327;3852;3853	984;2356;3026;4670;5551;6174;6859;7997;7998;7999	2437;2438;2439;2440;5609;5610;6947;10070;11639;12872;12873;14141;16826;16827;16828	2439;5609;6947;10070;11639;12872;14141;16827	279	3
Atp6v1g2	>sp|Q9WTT4|VATG2_MOUSE V-type proton ATPase subunit G 2 OS=Mus musculus GN=Atp6v1g2 PE=2 SV=1;>tr|B0V2H4|B0V2H4_MOUSE V-type proton ATPase subunit G 2 OS=Mus musculus GN=Atp6v1g2 PE=4 SV=1	14665000	86762000	2095100	12395000	14	933	273;595;2686	True;True;True	297;642;2929	773;774;1426;6098	1919;1920;1921;1922;1923;1924;1925;1926;1927;3478;3479;3480;3481;12751	1925;3478;12751	392	63
Hnrnpa2b1	>sp|O88569-3|ROA2_MOUSE Isoform 3 of Heterogeneous nuclear ribonucleoproteins A2/B1 OS=Mus musculus GN=Hnrnpa2b1;>sp|O88569-2|ROA2_MOUSE Isoform 2 of Heterogeneous nuclear ribonucleoproteins A2/B1 OS=Mus musculus GN=Hnrnpa2b1;>sp|O88569|ROA2_MOUSE Heteroge	13268000	0	737090	0	13	346	1009;1023;1375;2748	True;True;True;True	1093;1109;1491;2996	2450;2451;2474;3213;3214;6227	5793;5794;5795;5848;7247;7248;7249;7250;7251;7252;7253;7254;12945	5795;5848;7248;12945
Dnajc6	>sp|Q80TZ3-2|AUXI_MOUSE Isoform 2 of Putative tyrosine-protein phosphatase auxilin OS=Mus musculus GN=Dnajc6	12397000	0	302370	0	12	712	3;144;186;323;546;987;1247;1466;1479;1858;2280;2303;2485;2582;2583;2586;2724;2786;2814;2830;2986;3438;3477;3617;3671	False;False;False;False;False;False;False;False;False;False;True;False;False;False;False;False;False;False;False;False;False;False;False;False;False	3;156;199;200;352;589;1066;1347;1583;1584;1599;2005;2458;2459;2491;2492;2709;2710;2814;2815;2818;2969;3037;3067;3085;3261;3744;3790;3939;4001;4002	4;5;6;7;8;9;486;487;488;489;490;491;572;573;574;575;576;886;887;1326;1327;1328;2416;2417;2418;2419;2937;2938;2939;2940;3394;3395;3396;3397;3398;3399;3400;3420;3421;3422;3423;4191;5132;5133;5134;5135;5136;5178;5179;5180;5181;5182;5183;5624;5625;5626;5627;5628;5846;5847;5848;5849;5853;5854;5855;5856;6183;6184;6301;6302;6303;6304;6305;6306;6307;6308;6389;6428;6750;7740;7741;7742;7743;7894;7895;8188;…	4;5;6;7;8;9;10;11;12;13;14;15;16;1393;1394;1395;1396;1397;1398;1399;1400;1401;1402;1403;1404;1405;1406;1407;1408;1409;1410;1411;1537;1538;1539;1540;1541;1542;1543;1544;1545;1546;1547;2240;2241;3291;3292;3293;3294;3295;3296;3297;5725;5726;5727;5728;5729;5730;5731;5732;5733;5734;5735;5736;5737;5738;5739;5740;5741;5742;5743;6770;6771;6772;6773;6774;6775;6776;6777;7545;7546;7547;7548;7549;7550;7551;7…	8;1407;1540;2240;3296;5736;6770;7573;7626;9060;10912;10993;11807;12263;12267;12284;12885;13084;13281;13326;13940;16227;16663;17343;17680	335;337;338;339;340;341;342;343	1;12;63;135;827;843;879;882
Calcoco1	>tr|E9Q7U2|E9Q7U2_MOUSE Calcium-binding and coiled-coil domain-containing protein 1 OS=Mus musculus GN=Calcoco1 PE=4 SV=1;>sp|Q8CGU1|CACO1_MOUSE Calcium-binding and coiled-coil domain-containing protein 1 OS=Mus musculus GN=Calcoco1 PE=1 SV=2	12243000	0	360080	0	5	224	21;615;1477;2097;3361	True;True;True;True;True	22;663;1597;2258;3663	107;1461;3418;4708;7590	345;3548;7622;10133;15961	345;3548;7622;10133;15961
Snap25	>sp|P60879|SNP25_MOUSE Synaptosomal-associated protein 25 OS=Mus musculus GN=Snap25 PE=1 SV=1	11701000	179180000	900070	13783000	67	510	47;55;343;706;728;1271;2320;2721;3224	True;True;True;True;True;True;True;True;True	51;60;372;761;762;785;786;1371;1372;2515;2966;3515;3516	183;200;919;920;921;922;1642;1643;1644;1645;1646;1647;1648;1649;1650;1678;1679;1680;1681;1682;1683;1684;2986;2987;2988;5224;5225;5226;6175;6176;6177;6178;7273;7274;7275;7276;7277;7278;7279;7280	621;669;670;2312;2313;2314;2315;3907;3908;3909;3910;3911;3912;3913;3914;3915;3916;3917;3918;3919;3920;3921;3922;3923;3924;3925;3926;3927;3928;3967;3968;3969;3970;3971;3972;3973;3974;3975;3976;3977;3978;6846;6847;6848;11067;11068;11069;12874;12875;12876;12877;15329;15330;15331;15332;15333;15334;15335;15336;15337;15338;15339;15340;15341;15342;15343;15344	621;670;2315;3918;3975;6847;11067;12877;15339	214;215;216;217	49;127;146;167
Nmt1	>sp|O70310|NMT1_MOUSE Glycylpeptide N-tetradecanoyltransferase 1 OS=Mus musculus GN=Nmt1 PE=1 SV=1	11170000	0	531900	0	4	340	129;1005;1633;1872;3088	True;True;True;True;True	138;1089;1768;2019;3368	448;2446;3745;4226;6958	1310;1311;5788;8249;9159;14586	1310;5788;8249;9159;14586
Csnk2a2	>sp|O54833|CSK22_MOUSE Casein kinase II subunit alpha OS=Mus musculus GN=Csnk2a2 PE=2 SV=1	10806000	0	568720	0	5	333	540;1269;1928;3501	True;True;True;True	583;1369;2079;3816	1306;2984;4352;7941	3269;6841;9405;16735;16736	3269;6841;9405;16736
Atp6v1d	>sp|P57746|VATD_MOUSE V-type proton ATPase subunit D OS=Mus musculus GN=Atp6v1d PE=1 SV=1	10616000	144740000	816610	11134000	48	500	12;13;489;934;2318;2826;3190;3541	True;True;True;True;True;True;True;True	12;13;14;530;1006;2512;3081;3477;3858	93;94;95;96;97;1212;2297;5221;6420;6421;6422;7158;7159;7160;8008;8009	317;318;319;320;321;322;323;324;325;326;327;3037;3038;5493;5494;5495;5496;5497;11060;13315;13316;13317;14985;14986;14987;14988;14989;14990;14991;14992;14993;14994;14995;14996;14997;14998;14999;15000;15001;15002;15003;15004;15005;15006;15007;15008;16838;16839;16840	319;324;3037;5496;11060;13317;14988;16839	209	230
Abca2	>tr|A2AJ26|A2AJ26_MOUSE ATP-binding cassette sub-family A member 2 OS=Mus musculus GN=Abca2 PE=3 SV=1;>sp|P41234|ABCA2_MOUSE ATP-binding cassette sub-family A member 2 OS=Mus musculus GN=Abca2 PE=1 SV=4	10575000	0	107910	0	6	43	139;147;1988;2082;2147;2302	True;True;True;True;True;True	148;159;2145;2243;2310;2490	468;498;4492;4684;4828;5177	1342;1425;9753;9754;10091;10377;10980	1342;1425;9754;10091;10377;10980
Csnk2b	>tr|G3UZJ5|G3UZJ5_MOUSE Casein kinase II subunit beta (Fragment) OS=Mus musculus GN=Csnk2b PE=3 SV=2;>sp|P67871|CSK2B_MOUSE Casein kinase II subunit beta OS=Mus musculus GN=Csnk2b PE=1 SV=1;>tr|G3UWU5|G3UWU5_MOUSE Casein kinase II subunit beta (Fragment) O	9332100	0	933210	0	2	282	892;2242	True;True	962;2413	2223;2224;5043	5336;5337;10762	5337;10762
Kiaa1467	>sp|Q8BYI8|K1467_MOUSE Uncharacterized protein KIAA1467 OS=Mus musculus GN=Kiaa1467 PE=2 SV=1;>sp|Q8BYI8-2|K1467_MOUSE Isoform 2 of Uncharacterized protein KIAA1467 OS=Mus musculus GN=Kiaa1467	8887300	0	329160	0	2	752	1893;3309	True;True	2041;3608	4259;7465	9220;15709	9220;15709
Eif4g1	>tr|E9PVC6|E9PVC6_MOUSE Eukaryotic translation initiation factor 4 gamma 1 OS=Mus musculus GN=Eif4g1 PE=1 SV=1;>tr|E9Q9E1|E9Q9E1_MOUSE Eukaryotic translation initiation factor 4 gamma 1 OS=Mus musculus GN=Eif4g1 PE=1 SV=1;>tr|E9PVC5|E9PVC5_MOUSE Eukaryotic	8716800	0	132070	0	12	190	884;1085;1162;1727;2192;3077;3422	True;True;True;True;True;True;True	952;1172;1255;1862;2359;3356;3727	2188;2613;2760;3917;4909;6943;7704	5253;5254;5255;5256;5257;6148;6149;6422;8514;10523;14548;16167	5254;6148;6422;8514;10523;14548;16167
Celf2	>tr|S4R2J2|S4R2J2_MOUSE CUGBP Elav-like family member 2 (Fragment) OS=Mus musculus GN=Celf2 PE=4 SV=1;>tr|S4R2L5|S4R2L5_MOUSE CUGBP Elav-like family member 2 (Fragment) OS=Mus musculus GN=Celf2 PE=4 SV=1;>tr|A3KGT0|A3KGT0_MOUSE CUGBP Elav-like family membe	8220000	0	1174300	0	2	67	19;2288	True;True	20;2469	105;5149	341;10941	341;10941
Eif3h	>sp|Q91WK2|EIF3H_MOUSE Eukaryotic translation initiation factor 3 subunit H OS=Mus musculus GN=Eif3h PE=1 SV=1	8010600	0	400530	0	4	807	266;1203;2516;3383	True;True;True;True	289;1300;2742;3686	757;2857;5703;7626	1883;6625;11989;16037	1883;6625;11989;16037
Snx1	>tr|Q6NZD2|Q6NZD2_MOUSE Sorting nexin 1 OS=Mus musculus GN=Snx1 PE=2 SV=1;>sp|Q9WV80|SNX1_MOUSE Sorting nexin-1 OS=Mus musculus GN=Snx1 PE=1 SV=1	7824000	0	326000	0	9	682	194;317;923;1607;3751;3809	True;True;True;True;True;True	209;345;993;1737;4089;4150	594;870;2277;3690;8549;8653	1573;2200;5442;5443;5444;8108;18259;18433;18434	1573;2200;5443;8108;18259;18433
Atp6v1f	>sp|Q9D1K2|VATF_MOUSE V-type proton ATPase subunit F OS=Mus musculus GN=Atp6v1f PE=1 SV=2	6639800	114200000	829980	14275000	21	872	533;1097;1924;2512;2925	True;True;True;True;True	576;1184;1185;2075;2738;3196	1296;1297;2632;2633;2634;4347;5691;5692;6632;6633	3239;3240;3241;3242;3243;3244;3245;3246;3247;3248;3249;3250;6177;6178;6179;9390;11949;11950;11951;13719;13720	3248;6177;9390;11949;13719	386	112
Hnrnpab	>tr|Q80XR6|Q80XR6_MOUSE Heterogeneous nuclear ribonucleoprotein A/B OS=Mus musculus GN=Hnrnpab PE=2 SV=1;>tr|Q20BD0|Q20BD0_MOUSE Heterogeneous nuclear ribonucleoprotein A/B OS=Mus musculus GN=Hnrnpab PE=2 SV=1;>sp|Q99020|ROAA_MOUSE Heterogeneous nuclear ri	5955800	0	541440	0	1	615	1406	TRUE	1522	3264	7329	7329
Atp2b1	>sp|G5E829|AT2B1_MOUSE Plasma membrane calcium-transporting ATPase 1 OS=Mus musculus GN=Atp2b1 PE=1 SV=1	4485000	88280000	89699	1765600	20	290	573;579;1032;1053;2710;2750;2932;3021;3291;3721	True;True;True;True;True;True;True;True;True;True	618;625;1119;1140;2954;2998;3204;3205;3297;3588;4057	1373;1382;2489;2548;6160;6229;6658;6659;6818;7413;8457;8458;8459;8460	3392;3407;5872;5873;5874;5875;5975;12850;12947;13804;13805;14071;15609;18055;18056;18057;18058;18059;18060;18061	3392;3407;5873;5975;12850;12947;13805;14071;15609;18059
Eif3l	>sp|Q8QZY1|EIF3L_MOUSE Eukaryotic translation initiation factor 3 subunit L OS=Mus musculus GN=Eif3l PE=1 SV=1	4476300	0	154350	0	4	779	1753;1918;2715	True;True;True	1890;2069;2959	3972;4339;6166;6167	8596;9382;12859;12860	8596;9382;12860
Trim2	>tr|Q3UHH4|Q3UHH4_MOUSE Tripartite motif-containing protein 2 OS=Mus musculus GN=Trim2 PE=2 SV=1;>tr|E9QKC6|E9QKC6_MOUSE Tripartite motif-containing protein 2 OS=Mus musculus GN=Trim2 PE=4 SV=1;>sp|Q9ESN6|TRIM2_MOUSE Tripartite motif-containing protein 2 O	4302200	0	113210	0	5	231	267;2046;2982	True;True;True	290;2207;3257	758;4619;6746	1884;1885;1886;9995;13936	1884;9995;13936
Eif3m	>sp|Q99JX4|EIF3M_MOUSE Eukaryotic translation initiation factor 3 subunit M OS=Mus musculus GN=Eif3m PE=2 SV=1;>tr|A2A702|A2A702_MOUSE Eukaryotic translation initiation factor 3 subunit M OS=Mus musculus GN=Eif3m PE=4 SV=1;>tr|A2A701|A2A701_MOUSE Eukaryoti	4287800	0	252220	0	5	827	176;384;2098;2688	True;True;True;True	189;415;2259;2931	554;986;987;4709;6100	1505;2442;2443;10134;12753	1505;2443;10134;12753
Htatsf1	>sp|Q8BGC0|HTSF1_MOUSE HIV Tat-specific factor 1 homolog OS=Mus musculus GN=Htatsf1 PE=1 SV=1	4265500	0	85310	0	3	728	1217;2475	True;True	1314;2695	2876;2877;5589	6662;6663;11753	6663;11753
Pik3c2a	>tr|F8VPL2|F8VPL2_MOUSE Phosphatidylinositol 4-phosphate 3-kinase C2 domain-containing subunit alpha OS=Mus musculus GN=Pik3c2a PE=1 SV=1;>sp|Q61194|P3C2A_MOUSE Phosphatidylinositol 4-phosphate 3-kinase C2 domain-containing subunit alpha OS=Mus musculus GN	4265200	0	44897	0	7	259	707;807;1638;2135;3592	True;True;True;True;True	763;869;1773;2298;3914	1651;2013;3759;4812;8145	3929;3930;4903;4904;8289;10343;17274	3930;4903;8289;10343;17274
Eif3c	>sp|Q8R1B4|EIF3C_MOUSE Eukaryotic translation initiation factor 3 subunit C OS=Mus musculus GN=Eif3c PE=1 SV=1	4202200	0	100050	0	1	782	1148	TRUE	1239	2728	6352	6352
Eif3f	>sp|Q9DCH4|EIF3F_MOUSE Eukaryotic translation initiation factor 3 subunit F OS=Mus musculus GN=Eif3f PE=1 SV=2	4131500	0	275430	0	3	893	872;1916	True;True	938;2067	2162;4335;4336	5196;9378;9379	5196;9378
Btf3l4	>sp|Q9CQH7|BT3L4_MOUSE Transcription factor BTF3 homolog 4 OS=Mus musculus GN=Btf3l4 PE=2 SV=1	4044400	0	577760	0	3	846	370;1786	True;True	401;1926	970;4075	2411;8854;8855	2411;8854
Apmap	>sp|Q9D7N9|APMAP_MOUSE Adipocyte plasma membrane-associated protein OS=Mus musculus GN=Apmap PE=1 SV=1	3986400	0	173320	0	2	881	2010;2793	True;True	2167;3045	4543;6353	9876;13236	9876;13236
Dctn2	>sp|Q99KJ8|DCTN2_MOUSE Dynactin subunit 2 OS=Mus musculus GN=Dctn2 PE=1 SV=3	3914200	0	195710	0	4	831	1992;1996;3464	True;True;True	2149;2153;3773	4501;4507;7846	9779;9780;9786;16558	9780;9786;16558
Eif2s1	>sp|Q6ZWX6|IF2A_MOUSE Eukaryotic translation initiation factor 2 subunit 1 OS=Mus musculus GN=Eif2s1 PE=1 SV=3	3640900	0	165500	0	2	697	1315	TRUE	1425	3092;3093	7037;7038	7037
Rab18	>sp|P35293|RAB18_MOUSE Ras-related protein Rab-18 OS=Mus musculus GN=Rab18 PE=2 SV=2	3613800	0	277980	0	2	451	1460;1760	True;True	1577;1897	3387;3987	7535;8628	7535;8628
Sec23a	>tr|E9Q1S3|E9Q1S3_MOUSE Protein transport protein Sec23A OS=Mus musculus GN=Sec23a PE=4 SV=1;>sp|Q01405|SC23A_MOUSE Protein transport protein Sec23A OS=Mus musculus GN=Sec23a PE=1 SV=2	3577800	0	96698	0	4	207	980;1368;2369	True;True;True	1058;1484;2582	2397;3204;5368	5683;7236;11328;11329	5683;7236;11329
Atp6v1c1	>sp|Q9Z1G3|VATC1_MOUSE V-type proton ATPase subunit C 1 OS=Mus musculus GN=Atp6v1c1 PE=1 SV=4	3342300	141080000	123790	5225300	47	944	766;890;1248;2716;3125;3375;3376;3453;3571	True;True;True;True;True;True;True;True;True	827;960;1348;2960;2961;3408;3678;3679;3761;3892	1946;2221;2941;2942;6168;6169;6170;7020;7616;7617;7807;7808;7809;7810;8076;8077;8078;8079	4632;5332;5333;5334;6778;6779;12861;12862;12863;12864;12865;14690;14691;14692;14693;14694;14695;14696;14697;14698;14699;14700;16026;16027;16028;16444;16445;16446;16447;16448;16449;16450;16451;16452;16453;16454;16455;16456;16457;16966;16967;16968;16969;16970;16971;16972;16973	4632;5333;6779;12864;14695;16026;16028;16450;16968	394	207
Eif3i	>sp|Q9QZD9|EIF3I_MOUSE Eukaryotic translation initiation factor 3 subunit I OS=Mus musculus GN=Eif3i PE=1 SV=1	3321500	0	174820	0	3	927	622;1041;2310	True;True;True	670;1128;2502	1468;2511;5206	3556;5907;11038	3556;5907;11038
Anp32b	>sp|Q9EST5|AN32B_MOUSE Acidic leucine-rich nuclear phosphoprotein 32 family member B OS=Mus musculus GN=Anp32b PE=1 SV=1;>sp|Q9EST5-2|AN32B_MOUSE Isoform 2 of Acidic leucine-rich nuclear phosphoprotein 32 family member B OS=Mus musculus GN=Anp32b	3304000	0	330400	0	2	908	1745	TRUE	1881	3951	8553;8554	8554
Matr3	>tr|A0A087WQD6|A0A087WQD6_MOUSE Matrin-3 (Fragment) OS=Mus musculus GN=Matr3 PE=4 SV=1;>tr|A0A087WSU2|A0A087WSU2_MOUSE Matrin-3 (Fragment) OS=Mus musculus GN=Matr3 PE=1 SV=2;>sp|Q8K310|MATR3_MOUSE Matrin-3 OS=Mus musculus GN=Matr3 PE=1 SV=1	3277500	0	409680	0	2	6	1584	TRUE	1714	3645;3646	8040;8041	8041
Hnrnpc	>sp|Q9Z204-4|HNRPC_MOUSE Isoform 4 of Heterogeneous nuclear ribonucleoproteins C1/C2 OS=Mus musculus GN=Hnrnpc;>sp|Q9Z204-3|HNRPC_MOUSE Isoform 3 of Heterogeneous nuclear ribonucleoproteins C1/C2 OS=Mus musculus GN=Hnrnpc;>sp|Q9Z204-2|HNRPC_MOUSE Isoform C	3188000	0	177110	0	3	947	1003;3425	True;True	1086;3730	2443;7707	5785;16171;16172	5785;16171
Sh3glb2	>tr|A2AWI9|A2AWI9_MOUSE Endophilin-B2 OS=Mus musculus GN=Sh3glb2 PE=4 SV=1;>tr|A2AWI7|A2AWI7_MOUSE Endophilin-B2 OS=Mus musculus GN=Sh3glb2 PE=4 SV=1;>sp|Q8R3V5-3|SHLB2_MOUSE Isoform 3 of Endophilin-B2 OS=Mus musculus GN=Sh3glb2;>sp|Q8R3V5-1|SHLB2_MOUSE Is	3090900	0	193180	0	4	60	385;1772;3127	True;True;True	416;1910;3410	988;4010;7022;7023	2444;8690;14703;14704	2444;8690;14704
Atp6ap1	>sp|Q9R1Q9|VAS1_MOUSE V-type proton ATPase subunit (ATPase H+ transporting accessory protein 1) OS=Mus musculus GN=Atp6ap1 PE=1 SV=1	2836500	8822700	202610	630200	5	931	794;1114	True;True	855;1203	1985;2662	4739;6220;6221;6222;6223	4739;6221
Eps15l1	>sp|Q60902-3|EP15R_MOUSE Isoform 3 of Epidermal growth factor receptor substrate 15-like 1 OS=Mus musculus GN=Eps15l1;>sp|Q60902-4|EP15R_MOUSE Isoform 4 of Epidermal growth factor receptor substrate 15-like 1 OS=Mus musculus GN=Eps15l1;>sp|Q60902-2|EP15R_M	1726200	0	41100	0	1	656	2153	TRUE	2316	4834	10385	10385
Vps29	>tr|D3YW98|D3YW98_MOUSE Vacuolar protein sorting-associated protein 29 OS=Mus musculus GN=Vps29 PE=4 SV=1;>tr|D3YYD5|D3YYD5_MOUSE Vacuolar protein sorting-associated protein 29 (Fragment) OS=Mus musculus GN=Vps29 PE=4 SV=1;>tr|D3Z645|D3Z645_MOUSE Vacuolar	1705300	0	284210	0	1	134	3185	TRUE	3472	7152	14976	14976
Ddx3y	>sp|Q62095|DDX3Y_MOUSE ATP-dependent RNA helicase DDX3Y OS=Mus musculus GN=Ddx3y PE=1 SV=2	1656300	0	39436	0	1	668	454;509;1180;1317;2311;2718;2884;3449;3644;3763	False;False;False;False;False;False;False;False;True;False	490;550;1275;1427;2503;2504;2963;3146;3757;3970;4102	1116;1241;2786;3095;3096;3097;3098;5207;5208;5209;6172;6530;7794;7795;8252;8573	2781;3105;6459;7040;7041;7042;7043;7044;11039;11040;11041;11042;11043;12869;12870;13519;13520;13521;13522;16423;16424;17476;18305	2781;3105;6459;7042;11042;12870;13520;16424;17476;18305	129;130	351;354
Elavl1	>sp|P70372|ELAV1_MOUSE ELAV-like protein 1 OS=Mus musculus GN=Elavl1 PE=1 SV=2	1643700	0	102730	0	2	584	2474;3234	True;True	2694;3527	5588;7300	11752;15369	11752;15369
Atp6v1g1	>sp|Q9CR51|VATG1_MOUSE V-type proton ATPase subunit G 1 OS=Mus musculus GN=Atp6v1g1 PE=2 SV=3	1156700	14738000	192790	2456300	6	855	272;594	True;True	296;641	771;772;1425	1914;1915;1916;1917;1918;3477	1916;3477
Ap1s2	>tr|Q8BW87|Q8BW87_MOUSE AP-1 complex subunit sigma-2 OS=Mus musculus GN=Ap1s2 PE=2 SV=1;>tr|Q3TIV9|Q3TIV9_MOUSE AP-1 complex subunit sigma-2 OS=Mus musculus GN=Ap1s2 PE=2 SV=1	853290	0	85329	0	1	749	132;697;3695	True;False;False	141;748;4029	451;1605;8392	1317;3840;3841;17896	1317;3841;17896
Ap3s1	>sp|Q9DCR2|AP3S1_MOUSE AP-3 complex subunit sigma-1 OS=Mus musculus GN=Ap3s1 PE=1 SV=2	601200	0	66800	0	1	894	2426	TRUE	2642	5478	11533	11533
Ap3s2	>sp|Q8BSZ2|AP3S2_MOUSE AP-3 complex subunit sigma-2 OS=Mus musculus GN=Ap3s2 PE=1 SV=1	545210	0	60579	0	1	748	2427	TRUE	2643	5479	11534	11534
Synj1	>tr|E9Q7S0|E9Q7S0_MOUSE Synaptojanin-1 OS=Mus musculus GN=Synj1 PE=1 SV=1;>tr|F7BQW7|F7BQW7_MOUSE Synaptojanin-1 (Fragment) OS=Mus musculus GN=Synj1 PE=1 SV=1;>tr|D3Z656|D3Z656_MOUSE Synaptojanin-1 OS=Mus musculus GN=Synj1 PE=1 SV=1;>sp|Q8CHC4|SYNJ1_MOUSE	497430	4490600	7006.1	63248	5	170	1251;1917;2506	True;True;True	1351;2068;2731	2948;4337;4338;5673	6794;9380;9381;11918;11919;11920	6794;9381;11918
Ap3b2	>sp|Q9JME5|AP3B2_MOUSE AP-3 complex subunit beta-2 OS=Mus musculus GN=Ap3b2 PE=1 SV=2	443240	0	7387.3	0	1	921	2027	TRUE	2185	4569	9916	9916
Ap1m1	>tr|D3YZ71|D3YZ71_MOUSE AP-1 complex subunit mu-1 (Fragment) OS=Mus musculus GN=Ap1m1 PE=1 SV=1;>tr|S4R1Q4|S4R1Q4_MOUSE AP-1 complex subunit mu-1 (Fragment) OS=Mus musculus GN=Ap1m1 PE=4 SV=1	289820	70062000	24151	5838500	2	153	597;1280;1499;1846;2345;2867;3642	False;False;False;False;True;False;False	644;645;1389;1621;1991;2551;2552;3128;3968	1428;1429;3024;3455;3456;4173;5306;5307;6501;8250	3483;3484;3485;3486;6943;6944;7683;7684;7685;9029;9030;9031;11237;11238;13468;17470;17471;17472	3485;6943;7684;9030;11237;13468;17471	49;50;51	8;12;19
Atp8a1	>tr|F6WYQ5|F6WYQ5_MOUSE Phospholipid-translocating ATPase (Fragment) OS=Mus musculus GN=Atp8a1 PE=1 SV=1;>sp|P70704-3|AT8A1_MOUSE Isoform 3 of Phospholipid-transporting ATPase IA OS=Mus musculus GN=Atp8a1;>sp|P70704-2|AT8A1_MOUSE Isoform 2 of Phospholipid-	0	325390000	0	6025700	41	250	1254;1270;1467;1795;1819;2087;2467;2530;3170;3217;3249;3287;3711;3776	True;True;True;True;True;True;True;True;True;True;True;True;True;True	1354;1370;1585;1935;1963;2248;2687;2758;3455;3507;3543;3583;4047;4116	2952;2985;3401;4086;4087;4133;4689;5560;5744;7114;7247;7329;7405;8445;8446;8592	6799;6842;6843;6844;6845;7593;7594;8872;8873;8874;8966;8967;8968;10103;10104;10105;10106;11657;11658;12099;14849;14850;15210;15211;15212;15213;15404;15405;15406;15594;18036;18037;18038;18039;18040;18041;18042;18043;18335;18336;18337	6799;6843;7594;8874;8966;10105;11658;12099;14850;15211;15405;15594;18038;18336
Atp2b2	>tr|F8WHB1|F8WHB1_MOUSE Calcium-transporting ATPase OS=Mus musculus GN=Atp2b2 PE=1 SV=1;>sp|Q9R0K7|AT2B2_MOUSE Plasma membrane calcium-transporting ATPase 2 OS=Mus musculus GN=Atp2b2 PE=1 SV=2;>tr|S4R1C4|S4R1C4_MOUSE Calcium-transporting ATPase OS=Mus musc	0	43626000	0	779040	20	263	108;578;1364;2710;2750;3021;3057;3293;3722	True;True;True;False;False;False;True;True;True	114;624;1480;2954;2998;3297;3335;3590;4058	332;333;1381;3198;3199;6160;6229;6818;6867;7415;7416;7417;8461;8462	1007;1008;1009;1010;1011;1012;1013;3404;3405;3406;7229;7230;12850;12947;14071;14151;15611;15612;15613;18062;18063;18064;18065	1008;3405;7230;12850;12947;14071;14151;15611;18065
Atp6ap2	>sp|Q9CYN9|RENR_MOUSE ATPase H+ transporting accessory protein 2/Renin receptor OS=Mus musculus GN=Atp6ap2 PE=2 SV=2	0	30516000	0	2034400	1	864	2612	TRUE	2847	5908	12391	12391
Sv2c	>tr|A2RSH4|A2RSH4_MOUSE Sv2c protein OS=Mus musculus GN=Sv2c PE=2 SV=1;>sp|Q69ZS6|SV2C_MOUSE Synaptic vesicle glycoprotein 2C OS=Mus musculus GN=Sv2c PE=1 SV=2	0	27049000	0	1423600	2	63	1188;1262	False;True	1283;1284;1362	2797;2798;2799;2800;2801;2802;2803;2804;2969;2970	6472;6473;6474;6475;6476;6477;6478;6479;6480;6481;6482;6483;6484;6485;6486;6487;6488;6489;6490;6491;6826;6827	6476;6827	16	358
Atp2b3	>tr|Q8C048|Q8C048_MOUSE Calcium-transporting ATPase OS=Mus musculus GN=Atp2b3 PE=2 SV=1;>tr|A2ALL9|A2ALL9_MOUSE Calcium-transporting ATPase OS=Mus musculus GN=Atp2b3 PE=1 SV=1;>tr|Q0VF55|Q0VF55_MOUSE Calcium-transporting ATPase OS=Mus musculus GN=Atp2b3 PE	0	23119000	0	502600	5	45	579;1363;2359;2710;2750;3292;3723	False;True;True;False;False;True;True	625;1479;2570;2954;2998;3589;4059	1382;3197;5347;6160;6229;7414;8463	3407;7228;11302;12850;12947;15610;18066;18067	3407;7228;11302;12850;12947;15610;18067
Atp2b4	>tr|Q32ME1|Q32ME1_MOUSE Calcium-transporting ATPase OS=Mus musculus GN=Atp2b4 PE=2 SV=1;>tr|F7AAP4|F7AAP4_MOUSE Calcium-transporting ATPase OS=Mus musculus GN=Atp2b4 PE=1 SV=1;>tr|E9Q828|E9Q828_MOUSE Calcium-transporting ATPase OS=Mus musculus GN=Atp2b4 PE	0	8744700	0	182180	3	225	579;2540;2710;3290;3721	False;True;False;True;False	625;2770;2954;3587;4057	1382;5770;6160;7412;8457;8458;8459;8460	3407;12145;12850;15607;15608;18055;18056;18057;18058;18059;18060;18061	3407;12145;12850;15607;18059
Bsn	>sp|O88737-2|BSN_MOUSE Isoform 2 of Protein bassoon OS=Mus musculus GN=Bsn;>sp|O88737|BSN_MOUSE Protein bassoon OS=Mus musculus GN=Bsn PE=1 SV=4	0	6832400	0	36932	2	348	1979;2815	True;True	2133;3068	4456;6390	9651;13283	9651;13283
Syt1	>tr|D3Z7R4|D3Z7R4_MOUSE Synaptotagmin-1 (Fragment) OS=Mus musculus GN=Syt1 PE=1 SV=1	0	5610000	0	701240	1	173	499;2121;3209;3222;3427;3428;3567	True;False;False;False;False;False;False	540;2284;3498;3512;3513;3732;3733;3888	1228;4791;7201;7202;7203;7204;7205;7206;7207;7253;7254;7255;7256;7257;7258;7259;7260;7261;7262;7263;7264;7265;7266;7267;7268;7269;7270;7271;7709;7710;7711;7712;7713;7714;7715;8064	3079;10307;15068;15069;15070;15071;15072;15073;15074;15075;15076;15077;15078;15079;15080;15081;15082;15083;15084;15085;15086;15087;15088;15089;15090;15091;15092;15093;15094;15095;15096;15097;15098;15099;15222;15223;15224;15225;15226;15227;15228;15229;15230;15231;15232;15233;15234;15235;15236;15237;15238;15239;15240;15241;15242;15243;15244;15245;15246;15247;15248;15249;15250;15251;15252;15253;1525…	3079;10307;15089;15231;16175;16178;16951	55;56	170;223
Aplp2	>tr|Q60709|Q60709_MOUSE Amyloid-like protein 2 OS=Mus musculus GN=Aplp2 PE=2 SV=1;>sp|Q06335-2|APLP2_MOUSE Isoform 2 of Amyloid-like protein 2 OS=Mus musculus GN=Aplp2;>sp|Q06335|APLP2_MOUSE Amyloid-like protein 2 OS=Mus musculus GN=Aplp2 PE=1 SV=4	0	5498400	0	177370	3	611	1336;3568	True;True	1449;3889	3146;8065	7134;16952;16953	7134;16952
Snap25	>sp|P60879-2|SNP25_MOUSE Isoform 2 of Synaptosomal-associated protein 25 OS=Mus musculus GN=Snap25	0	4898700	0	408220	2	511	47;55;343;706;728;1271;2320;2721;3223	False;False;False;False;False;False;False;False;True	51;60;372;761;762;785;786;1371;1372;2515;2966;3514	183;200;919;920;921;922;1642;1643;1644;1645;1646;1647;1648;1649;1650;1678;1679;1680;1681;1682;1683;1684;2986;2987;2988;5224;5225;5226;6175;6176;6177;6178;7272	621;669;670;2312;2313;2314;2315;3907;3908;3909;3910;3911;3912;3913;3914;3915;3916;3917;3918;3919;3920;3921;3922;3923;3924;3925;3926;3927;3928;3967;3968;3969;3970;3971;3972;3973;3974;3975;3976;3977;3978;6846;6847;6848;11067;11068;11069;12874;12875;12876;12877;15327;15328	621;670;2315;3918;3975;6847;11067;12877;15327	214;215;216	127;146;167
Atp2a3	>tr|B1ATS4|B1ATS4_MOUSE Calcium-transporting ATPase OS=Mus musculus GN=Atp2a3 PE=3 SV=1;>tr|B1ATS5|B1ATS5_MOUSE Calcium-transporting ATPase OS=Mus musculus GN=Atp2a3 PE=3 SV=1;>tr|E9Q559|E9Q559_MOUSE Calcium-transporting ATPase OS=Mus musculus GN=Atp2a3 PE	0	4776100	0	111070	3	91	1644;1880;2274	False;True;True	1779;2028;2450	3771;3772;3773;3774;4244;5114;5115	8302;8303;8304;8305;9199;10876;10877	8305;9199;10877
